# Supplementary material
Source: PubMed Central journal article supplement (PMC3375929)
Supplement: supp_pp.112.194886_194886revSupplemental_Table_1.pdf [file supp_pp.112.194886_194886revSupplemental_Table_1.pdf]

**Supplemental Table 1. A**, Relative abundance of major latex alkaloids determined by HPLC in eight opium poppy cultivars. **B**, Relative abundance of scoulerine 9-*O*-methyltransferase (SOMT) gene transcripts compared with those of previously characterized *O*-methyltransferases involved in benzyloquinoline alkaloid biosynthesis in eight opium poppy cultivars. All values are the mean of three independent experiments.

**A** Relative abundance of major latex alkaloids (% maximum)

|             | <b>Marianne</b> | <b>Natasha</b> | <b>Roxanne</b> | <b>Veronica</b> | <b>Deborah</b> | <b>40</b> | <b>T</b> | <b>Przemko</b> |
|-------------|-----------------|----------------|----------------|-----------------|----------------|-----------|----------|----------------|
| Noscapine   | 23.6            | 100            | 41.8           | 61.8            | 3.6            | 0         | 0        | 0              |
| Narcotoline | 100             | 5.8            | 5.8            | 2.9             | 0              | 0         | 0        | 0              |
| Papaverine  | 0               | 0              | 80             | 100             | 0              | 0         | 0        | 0              |
| Morphine    | 98.0            | 54.9           | 100            | 92.1            | 76.4           | 86.2      | 0        | 62.7           |
| Codeine     | 2.9             | 5.8            | 8.8            | 5.8             | 35.2           | 20.5      | 0        | 100            |
| Oripavine   | 0               | 0              | 3.6            | 0               | 5.4            | 5.4       | 100      | 0              |
| Thebaine    | 2.2             | 26.6           | 22.2           | 8.8             | 95.5           | 100       | 95.5     | 0              |
| Reticuline  | 2.9             | 2.9            | 2.9            | 5.8             | 2.9            | 2.9       | 5.8      | 100            |

**B** Relative abundance of *O*-methyltransferase gene transcripts

|          | <b>Marianne</b> | <b>Natasha</b> | <b>Roxanne</b> | <b>Veronica</b> | <b>Deborah</b> | <b>40</b> | <b>T</b> | <b>Przemko</b> |
|----------|-----------------|----------------|----------------|-----------------|----------------|-----------|----------|----------------|
| PsSOMT1  | 47.8            | 26.0           | 69.56          | 100             | 0              | 0         | 0        | 0              |
| PsSOMT2  | 34.77           | 22.8           | 100            | 71.7            | 0              | 0         | 0        | 0              |
| PsSOMT3  | 22.3            | 41.4           | 100            | 45.7            | 0              | 0         | 0        | 0              |
| Ps6OMT   | 23.5            | 35.0           | 100            | 71.9            | 23.5           | 67.5      | 33.7     | 45.8           |
| PsN7OMT  | 2.1             | 41.3           | 50             | 71.7            | 100            | 36.9      | 47.8     | 26.0           |
| PsR7OMT  | 18.0            | 84.2           | 100            | 34.0            | 16.2           | 26.3      | 21.0     | 37.7           |
| Ps4'OMT1 | 6.3             | 28.8           | 100            | 60.3            | 50.4           | 71.1      | 67.5     | 53.1           |
| Ps4'OMT2 | 35.7            | 27.5           | 77.1           | 78.8            | 61.6           | 65.9      | 80.1     | 100            |
