# Supplementary material
Source: PubMed Central journal article supplement (PMC3375929)
Supplement: supp_pp.112.194886_194886Supplemental_Figure_1.pdf [file supp_pp.112.194886_194886Supplemental_Figure_1.pdf]

EcOMT -----MEK GK--LEVG EEMELQ GQAD ICKLMLAF IDSMALKCAV  
 Ps7OMT -----MDTAEER-LKQQA EIWEHMF AFVDSMALKCAV  
 VvReOMT -----MDLANGV--IS---AELLHAQA HVWNHIFNF IKSMSLKCAI  
 MpFlOMT -----MALPNGI--SSK--QELLEQAQHVWNH IYSY INSMSLKCAI  
 ObEuOMT -----MALQKVD--ISLSTEQLLQAQVHVWNHMYAFANSMSLKCAI  
 Ps6OMT -----METVS-----KIDQONQAKIWKQIYGF AESLVLKCAV  
 PsSOMT3 -----MEVVS-----KIDQENQAKIWKQIFGFAESLVLKCAV  
 PsN7OMT -----MEVVS-----QIDQENQAI IWKQIYGFSESLLLKCAV  
 Cj6OMT -----MEVK-----KDNLSSQAKLWNFIYGF AESLVLKCAV  
 Tf6OMT -----MEMIN-----KENLSSQAKLWNFIYGF ADSLVLKSAV  
 Ps4'OMT2 -----MG-SLDAKP--AAATQEVSIKDQAQLWNI IYGF ADSLVLRCAV  
 Ps4'OMT1 -----MGSSIDAE-----THEVDIKDQAQLWNI IYGYADSLVLRCTV  
 Cc4'OMT -----MAFHGK-----DDALDIKAQA HVWKI IYGF ADSLVLRCAV  
 Cj4'OMT -----MAFHGK-----DDVLDIKAQA HVWKI IYGF ADSLVLRCAV  
 Tf4'OMT -----MAAFQ GK-----DASVDIKAQA HVWKI IYGF ADSLVLRCAV  
 PtFlOMT -----MGSVTKIDE--EIREDEEEAQAKVEIWKYIFGF TNMAVLC AI  
 TtOMT -----MGSTQNN---HNLTP EEEEEACLHAMQ--LASASVLP MVLKAAI  
 TtCaOMT -----MGSTQKN---HNLTP EEEEEACLHAMQ--LASASVLP MVLKAAI  
 CaCafOMT -----MDSTN-----QNL TQTEDEAF LFAMQ--LASASVLP MVLKSAL  
 ObCafOMT -----MGSATN---TPQINSDEEENFLFAMQ--LASASVLP MVLKSAI  
 CbEuOMT -----MGSTGNAEIQI IPTHSSDEEANLFAMQ--LASAAVLP MALKAAI  
 CbCafOMT -----MGSTGNAETQLTPHVSDEEANLFAMQ--LASASVLP MVLKAAI  
 PsCaOMT -----MGSIRN-----VD--EDIQACRYAME--LASASVPMVLKTAI  
 PaCafOMT -----MGSASENS--EMNTKIVNEDEWLLGME-LGNF SCLPMGMKAAI  
 AmCafOMT -----MASHDQEAFLAAMQ--IVNSTV DGVLNALI  
 CjsOMT MCTSLSELKCPVFSTKRKLLLEFALRTSVDMAAQEGVNYLSGLG-LSRLICLPMALRAAI  
 TfsOMT -----MALQEGVNYLSGLG-LSRLICLPMALRAAI  
 PsSOMT1 ----MATNGE I FN TYGHN RQTATVTKITASN ESSNGVCYLSETANLGKLCIPMALRAAM  
 PsSOMT2 -----MEIHLESQ-----EQEMKYQSQIWNQICGTVDTSVLRCAI  
 CjCoOMT -----MDTPN---TFQNDDEIKAQAQVWKHMFGFAETIMLRSTV

EcOMT ELGIPDI I HSHGQP-----ITLSEIINGIPN-LSP--SFDINYLFRIMRLLVRNRVFSAY  
 Ps7OMT ELGIPDI I HSHGRP-----VTISEIVDSLKT-NTPSSSPNIDYLTRIMRLLVHKRFLTS-  
 VvReOMT QLGIPDI I HNHGKP-----MTLPELVAKLP--VHP---KRSQC VYRLMRILVHSGFLAAQ  
 MpFlOMT QLGIPDAIHKHGNP-----ITLSQLADALN--INK---AKSHGLFRLMRILVHSGFFDKV  
 ObEuOMT QLGIPDILHKHGRP-----MTLSQLLQSI P--INK---EKTQCFQRLMRALVNSNFFIEE  
 Ps6OMT QLEIAETLHNNVVKP-----MSLSELASKLPV-AQP---VNEDRLFRIMRYLVHMELFKID  
 PsSOMT3 QLEIAETLHNNVVKP-----MSLSELASKLP--AQP---VNEDRLYRILHFLVHMKLFNKD  
 PsN7OMT QCEIAETIHNHGTP-----MSILELA AKLP I--DQP---VNI DRLYRVMRYLVHQKLFNKE  
 Cj6OMT QLDLANI I HNSGTS-----MTLSELSSRLP--SQP---VNEDALYRVMRYLVHMKLF TKA  
 Tf6OMT QLDLANI I HNHGSP-----MTLSEL SLHLP--SQP---VNQDALYRVLRYLVHMKLF TKS  
 Ps4'OMT2 EIGIADI IKNNDGA-----ITLAQLAAKLP--ITN---VSSDYLYRMVRYLVHLNIEQE  
 Ps4'OMT1 EIGIADI IKNNNGS-----ITLSELVSKLP--LSN---VNSDNLYRLLRYLVHNLITGQQ  
 Cc4'OMT ELGIVDIVDNNNQ P-----MALADLASKLP--VSN---VNC DNLYRILRYLVKMEILRVE  
 Cj4'OMT ELGIVDI I DNNNQ P-----MALADLASKLP--VSD---VNC DNLYRILRYLVKMEILRVE  
 Tf4'OMT ELGIFDI I DNNNQ P-----IPLADLASKLP--ISN---VNL DNLFRI LR YLVKMELLSYA  
 PtFlOMT ELGIADAIENNEGP-----MTLSELSSSLG-----CAPSSLYRIMRFLVHHNIFKEK  
 TtOMT ELDVLEI IAKAGQG---AYVAPTEIASQLS--TSNS--QAPI I LDRILRLLASYKVLTCN  
 TtCaOMT ELDVLEI IAKAGQG---AYVAPTEIASQLS--TSNS--QAPI I LDRVLRLLASYKVLTCN  
 CaCafOMT ELDLLEIMAKAGPG---AAISPSELAAQLP--TKNP--EAPIMLDRMLRLLATYSV LNCT  
 ObCafOMT ELDLLELIKSGAG---AFVSPVDLAAQLP--TTNP--DAHVMLDRILRLLTSYAILECR  
 CbEuOMT ELDVLEIMAKSVPP-SG-YISP AEIAAQLP--TTNP--EAPVMLDRVLRLLASYSVVTYT  
 CbCafOMT ELDVLEIMAKSIPHGSGAYISP AEIAAQLP--TTNP--DAPVMLDRVLRLLASYSVVTCS  
 PsCaOMT ELDILEI I KKP GPG---TQISVSEIVSQIQN-LKNP--DAPVMLDRMLRLLASYNILTCS  
 PaCafOMT ELDVLQI IANAGNG---VQLSPRQIVAHIP--TTNP--DAAITLDRILRVLASHSVLSCS  
 AmCafOMT ELNVFDI I MKKVGLD---GYLHPDEIALNLP--AKNL--EASDMLDRMLRLLATHSIIKCK  
 CjsOMT ELNVFEI I SQAGPD---AQLSPSDIVAKIP--TKNP--SAAISLDRILRMLGASSILSVS  
 TfsOMT ELNVFEI I FQAGPE---AQLSPA EIVAKIP--TKNP--NAAIALDRILRMLGASSILSVT  
 PsSOMT1 ELNVFQLISKFGTD---AKVSASEIASKMPNAKNNP--EAAMYLDRI LRLLGASSILSVS  
 PsSOMT2 QLGIFDAIHNNGK P-----MITLTELSSIVSSPSSSS--IEPCNLYR LVRYLSQMDLISIG  
 CjCoOMT SLGIPDI I HNNG-P-----VTLSQLVTHLP--LKS---TSIDRFHFMRYLVHMQLFTIS

EcOMT EPDLKDGSSG-----TKTLYGLTPSSKWLVDK--SKISLAPLVLAEHNHPWLLDPWHYLK  
Ps7OMT --ELHQESN-----QLLYNLTRSSKWLKLD--SKFNLSPLVLWETNPILLKPWQYLK  
VvReOMT RVQ-----QGKEEGYVLTDAARLLMD--DSLSIRPLVLAMLDPIILTKPWHYLSA  
MpFlOMT KVKVKEGED--EEEEEDAYSLTPASRLLRS--EPLSVAFPALAMSDPVYETETWHHLE  
ObEuOMT NNS-----NNQEVCYWLTASCLLKE--APLTVTPLVQVLDPTFTNPWHHMSE  
Ps6OMT AT-----TQKYSLAPPAKYLLRG--WEKSMVDSILCINDKDFLAPWHHLGD  
PsSOMT3 AT-----TQKYSLAPPAKYLLK--WEKSMVPSILSVTDKDFMTAPWNHLGD  
PsN7OMT VISTLNGG----TVQVTEKYWLAPPAKYLRG--SQQSMVPSVLGIIDEDMFAPWHHLK  
Cj6OMT SIDG-----ELRYGLAPPAKYLVK--WDKCMVGSILAITDKDFMAPWHYLK  
Tf6OMT SIDG-----ELRYGLAPPAKYLVK--WDKCMGAILTITDKDFMAPWHYLK  
Ps4'OMT2 TCNGGV-----EKVYSLKPVGTLRLD--AERSMVPMLIGMTQKDFMVSWHFMKE  
Ps4'OMT1 TCAAGV-----DRVYSLKPVGTLRLK--SERSMAPVILGLSQKDFLFWVNFVKE  
Cc4'OMT KSDDG-----EKYALEPIATLLSRN--AKRSMVPMILIGMTQKDFMTPWHSMKD  
Cj4'OMT KSDDG-----QKKYALEPIATLLSRN--AKRSMVPMILIGMTQKDFMTPWHSMKD  
Tf4'OMT ADD-----KYALEPIAKLVLRN--EKRSMPVMLIGMTQKDFMTPWHSMKD  
PtFlOMT PSSQLG-----TTVVYVGLTNSRLLK--GEKSMVDLLLESHPMAPWHHLSS  
TtOMT LRTLE-----DGGVERLYGLAPVCKFLVKN--EDGVSMAPLVLMNQDKVLMESWYHLK  
TtCaOMT LRTLE-----DGGVERLYGLAPVCKFLVKN--EDGVSIAPLVLMNQDKVLMESWYHLK  
CaCafOMT LRTLPL-----DGRVERLYSLAPVCKLTKN--ADGVSAPLMLLMNQDKVLMESWYHLTD  
ObCafOMT LKTLPL-----DGGVERLYGLAPVCKFLTKN--EDGVSMAPLTLMNQDKVLMESWYHLSD  
CbEuOMT LRELPL-----SGKVERLYGLAPVCKFLTKN--EDGVS LAPFLLTATDKVLEPWFYKLD  
CbCafOMT LRELPL-----DGKVERLYGLAPVCKFLTKN--EDGVS LAPCLMNQDKVLMESWYHLK  
PsCaOMT LKDGGN-----DDKVERLYGLAPVCKFLTKN--EAGCSMSALLLMNQDKVLMESWYHLK  
PaCafOMT VTTDE-----NGKAERLYGLTPLCKYLK--QDGVSLAPLVLMNQDKVLMDSWYHLK  
AmCafOMT LVKRSGG----THRLTRSYGLTISISQYFVQA--KDGPC LAPYIRLIHHKEMQRSWSKVVD  
CjsOMT TTKS-----GRVYGLNEESRCLVAS--EDKVSVPMLLFTSDKAVVESFYNIK  
TfsOMT TMKD-----GRVYGLTEESRCLVAD--KNGVSVPMLLFTSDKAVVESFYNIK  
PsSOMT1 TTKKSINRGDDVVVHEKLYGLTNSCCLVPRQEDGVSLVEELLFTSDKVVVDSFFKLK  
PsSOMT2 ECLN-----EATVSLTGTSKLLLRN--QEKSLIDWVLAIXCEMMVVVWHELSS  
CjCoOMT TDQITK-----EDKYELTPASKLLVHG--HQKSLAPYVMLQTHPEEFSVWVSHVIN

EcOMT CVQEGG----FAFAKAHG--SEIWKFGSENPENKLFVSGMACSSTLVVDAILD--NYHEGF  
Ps7OMT CAQEKs----SPFERAHG--CEIWDLALADPKFNNFLNGAMQCSTTTIINEMLL--EYKDFG  
VvReOMT WFQNDd---PTPFHTAHE--RSFWDYAGHEPQLNNSFNEAMASDARLLTSVLLK--EGQGVF  
MpFlOMT WFRNDA---VAAFDTKYG--MTFPEYAVADDRLNVLVFNEMACDAGFVNSILTT--ECREIF  
ObEuOMT WFTHEKH--ATQFEAANG--CTFWEKLANEPSKGRFFDEAMSCDSRLIAHVFTK--DYKHVI  
Ps6OMT GLTG----NCDAFEKALG--KSIWVYMSNPENKQLFNAAMACDTRLVTSALAN--ECKSIF  
PsSOMT3 GLTG----NCNAFEKALG--KGIWVYMSNPENKQLFNEGMACDTRLFASALVN--ECKSIF  
PsN7OMT SLTG----ECNIFETALG--KSIWVYMSNPENQISNGAMAFDSGLVTSHLVN--ECKSVF  
Cj6OMT GLS--G--ESGTAFKALG--TNIWGYMAEHPEKNQLFNEAMANDSRLIMSALVK--ECGNIF  
Tf6OMT GILNDG--STSTAFKALG--TNIWGYMAEHPEKNQLFNEGMANDTRLIMSALVK--ECSSMF  
Ps4'OMT2 GLGNGST---TAFEKMG--MDIWKYLEGNPDQSQLFNEGMAGETRLLTKTLIE--DCRDTF  
Ps4'OMT1 GLGTGST---TAFEKMG--MDMWKYLEGNPDQSQLFNEGMAGETRLLTKTLIE--DCRDTF  
Cc4'OMT GLSDNG----TAFEKMG--MTIWEYLEGHPDQSQLFNEGMAGETRLLTSSLIS--GSRDMF  
Cj4'OMT GLSDNG----TAFEKMG--MTIWEYLEGHPDQSQLFNEGMAGETRLLTSSLIS--GSRDMF  
Tf4'OMT GLTDNGV---TAFEKMG--MTIWEYLEGHPDQSQLFNEGMAGETRLLTSSLIS--GSKDMF  
PtFlOMT RVLNDN---NSPFEGAHG--DDIWKYALANPVHSKLIDDAMACDAKLVVPEIVE--GFPEVF  
TtOMT AVLD----GGIPFNKAYG--MTAFEYHGTDPRFNKVFNRGMSDHSTITMKKLE--LYKGF  
TtCaOMT AVLD----GGIPFNKAYG--MTAFEYHGTDPRFNKVFNRGMADHSTITMKKLE--LYKGF  
CaCafOMT AVLD----GGVFPFNKAYG--MTAFEYHGTDPRFNKVFNRGMSDHSTITMKKILE--DYKGF  
ObCafOMT AVVD----GGIPFNKAYG--MTAFEYHGTDPRFNKVFNRGMSNHSTITMKKILE--TYTGFD  
CbEuOMT AILE----GGIPFNKAYG--MNEFDYHGTDHRFNKVFNRGMSNHSTITMKKILE--MYNGFE  
CbCafOMT AILD----GGIPFNKAYG--MTAFEYHGTDPRFNKVFNRGMSDHSTITMKKIFE--MYTGFE  
PsCaOMT AILD----GGIPFNKAYG--VHAFYHGKDLRFNKFVNRGMSDHTTITMKKILE--TYKGF  
PaCafOMT AVLE----GSQPFTKAHG--MNAFEYPAKQRFNRFNRGMSSEHSTMLMNLID--TYQGF  
AmCafOMT ATIE----GGVFPNKAHGKNIFFEYLEKDKDLAELLSQAMDKSIATSMNILLQ--MYKGLE  
CjsOMT VVLEE---GVIPFDRTHG--MDFFQYAGKEERVNKSFNQAMGAGSTIAFDEVFK--VYKGF  
TfsOMT VVLEE---GVIPFDRTHG--MDFFAYAGKEQSVNKSFNQAMGAGSTIAFDEVFK--VYKGF  
PsSOMT1 VVEEK---DSVPFEVAHG--AKIFEYAATEPRMNQVFNDGMVAFSIVVFEAVFR--FYDGF  
PsSOMT2 SVSTPAD--EPPIFQKVHG--KNALELAGEFPEWNDLINNAMTSDTSVTKPALIQ--GCGKIL  
CjCoOMT VLDG----KKPYWESND--TSMYEKTEGDP EINEILNDAMTSHSTFM L PALVSLMKENV

EcOMT GDLE-SIVDVGGAIGTLNEIVKKYPHIRGTNFDLPHVVAEALENPGVAHVGGDMFVEIP  
 Ps7OMT SGIAGSLVDVGGGTGSI IAEIVKAHPHIQGINFDLPHVVATAAEFPGVKHVGGDMFVDIP  
 VvReOMT -AGLNSLVDVGGGTGKVAKAIANAFPHLNCTVLDLPHVVAGLQGSKNLNYFAGDMFEAIP  
 MpFLOMT -DGLSMVDVGGGTGATAKGI AAFPGMECTVLDLPHVVGGLKGSNLSFVSGDMFDFIP  
 ObEuOMT -EGIRTLVDVGGGNGTMAKAI VEAMPTIKCTVIDLPHVVAGLESTDNLNYIGGDMFQSIIP  
 Ps6OMT SDGISTLVDVGGGTGTAVKAI SKAFPDIKCTIYDLPHVIADSP EIPNITKISGDMFKSIP  
 PsSOMT3 SDGINTLAGVGRGTGTAVKAI SKAFPDIKCTIHDLP EXT SKN-----SKI XRDVFKSVP  
 PsN7OMT GDEIKTLVDVGGGTGTALRAI SKAFPNIKCTLFDLPHVIADSP EIPPTITKVSGDMFKSIP  
 Cj6OMT -NGITTLDVVDVGGGTGTAVRNIA NAFPHIKCTVYDLPHVIADSPGYSEVHC VAGDMFKFIP  
 Tf6OMT -DGITTIVDVGGGTGTAVRNIA KAFPHIKCTVYDLPHVIADSPGYTEINSIQGDMFKYIP  
 Ps4'OMT2 -QGLDSLVDIGGGNGTTIKAI YEAFPHIKCTLYDLPHVVANSHDL PNI EKVP GDMFKSVP  
 Ps4'OMT1 -QGMDSLVDVGGGNGTTIKAI HEAFPHIKCTLYDLPHVIANSDDHPN ILKVP GDMFMSVP  
 Cc4'OMT -QGIDSLVDVGGGNGTTVKAI SDAFPHIKCTLFDLPHVIANSYDHPN IERIGGDMFKSVP  
 Cj4'OMT -QGIDSLVDVGGGNGTTVKAI SDAFPHIKCTLFDLPHVIANSYDLP NIERIGGDMFKSVP  
 Tf4'OMT -QSIDSLVDVGGGNGTTIKAI SVAFPHIKCTLFDLPHVIANSYDHPN IERIGGDMFKGMP  
 PtFLOMT -DGVKTLVDVGGGNGTTLQMLVAKYPSIKGINFDLPHVSVASESEGVGDFEVSVP  
 TtOMT --GLKSVVDVGGGTGATVNMIVTKHPTIKGINFDLPHVIEDAPAYPGVEHIGGDMFVCVP  
 TtCaOMT --GLKSVVDVGGGTGATINMIVTKHPTIKGINFYLP HVIDDAPAYPGVEHIGGDMFVSVP  
 CaCaOMT --GLNSIVDVGGGTGATVNMIVSKYPSIKGINFDLPHVIEDAPAYPGVEHVGGDMFVSVP  
 ObCaOMT --GLKTVVDVGGGTGATLNMIVSKYPSIKGINFDLPHVIEDAPSYPGVEHVGGDMFVSVP  
 CbEuOMT --GLTTIVDVGGGTGAVASMI VAKYPSINAINFDLPHVIQDAPAFSGVEHLGGDMFDGVP  
 CbCaOMT --ALNTIVDVGGGTGAVLSMI VAKYPSIKGINFDLPHVIEDAPI YPGVEHVGGDMFVSVP  
 PsCaOMT --GLNSIVDVGGVGATVSMI ISKYPTIQGINFDLPHVIQDAPSFPGIKHVGGDMFASVP  
 PaCaOMT --EVQELVDVGGVGSTLNLIVSRYPHISGINFDMPHVVT DAPHYPAVKHVGGDMFDSVP  
 AmCaOMT --GVQEVVDVGGGAHGATLSCIVSMNPHLKGINFDLPHVVK NAPSLPGIVHVGGDMFESVP  
 CjSOMT --NLKELVDVGGGIGTSLSNIVAKHPHIRGINFELPHVIGDAPDYPGVEHVPGDMFEGVP  
 TfSOMT --DLKELVNVGGGIGTSLSNIFKYPHIKGINFELPHVIADAPNYPGVEH IAGNMFEGVP  
 PsSOMT1 --DMKELLDVGGGIGT SVKIVAKYPLIRGVNFDLPHVIVSAPQYPGVEHVAGDMFEVVP  
 PsSOMT2 N-GVTSLIDVGGGHGATMAYIVEAFPHIKGAVIDLPHVVEAAPERPGVEFISGDIFKSI S  
 CjCoOMT LDGVASIVDVGGNSGVVAKGIVDAFPHVKCSVMDLNHVI ERV IKNPKLDYVAGDMF TSI P

EcOMT SADAVILKWVLHDWNEDECVKILKNCNKAISNK----GKLIIECVLKP D-GEGLFDGLG  
 Ps7OMT EADAVIMKWILHDWSDEDC TILKNCYRAIRKKK--NGKVIIVDCVLRPD-GNDFDKMG  
 VvReOMT PADAILLKWILHDWSDEECVKILKRCREAI PSKENGK-KVIIIDMIMMKNQGDYKSTETQ  
 MpFLOMT HADAI FMKILHDWNEDECVKILKCKEAI SRSNNSCRK IILVEIVMEDEKETHEATETK  
 ObEuOMT SADAILLKSIIHDWDDVEGLKILKCKDAV---VMGG-KVIIIDVVVGNHDI DEVLEDQ  
 Ps6OMT SADAI FMKILHDWNEDEC IQILKRCKEALP----KVGKVIIVDVVIDMD-STHPYAKIR  
 PsSOMT3 SADAI FMKSI LHENWNEEC IQILKRCKEAIP----KGGKVI IADVVIMD-STHPYKSR  
 PsN7OMT SADAI FMKNILHDWNEDEC IQILKRC KD VVS----AGGKLIMVEMVLEDE-SFHPYSKLR  
 Cj6OMT KADAI MMKILHDWDDKECIEILKRCKEAVPV---KGGKVI IVDIVLVNQ-SEHPYTKMR  
 Tf6OMT NADAI MMKILHDWDDKECIEILKRC KD AVPR---DGGKVI IIDIILDVK-SEHPYTKMR  
 Ps4'OMT2 SAQA ILLKLILHDWTD EECVNILKCKEAI PK---ETGKVI IVDVALEEE-SNHELTKR  
 Ps4'OMT1 SAQV LLLKVLHDWTD EHCRLKLNCHKALP---ETGKVI IVDVALEEE-SEHELTSAR  
 Cc4'OMT SAQA ILLKLILHDWNEDESIKILKQCRNAVPK---DGGKVI IVDVALDEE-SDHELSTR  
 Cj4'OMT SAQA ILLKLILHDWNEDESIKILKQCRNAVPK---DGGKVI IVDVALDEE-SDHELSTR  
 Tf4'OMT SAQA ILLKLILHDWNEDESIKILKQCRKAVPK---DGGKVI IVDVALDEE-SDHELSTR  
 PtFLOMT KADAAFLMWVLHDWNEEC IQILKNCKEAIQS---DKGKVI IVEAVVGEE-KGDKLEFVR  
 TtOMT KGDAIFMKWILHDWSDEHSVKFLKNCYESIP----ADGKVIDVESILPVPETNLANAC  
 TtCaOMT KGDAIFMKWILHDWSDEHSVKFLKNCYESIP----ADGKVI IVECILPVYPETNLANAC  
 CaCaOMT KADAI FMKWICHWSDEHCLKFLKNCYEALP----ANGKVLVAECILPETPDTSAATKNA  
 ObCaOMT KGDAIFMKWICHWSDEHCVKFLKNCYDALP----QNGKVI LAECVLP EAPDTGLATKNV  
 CbEuOMT KGDAIFIKWICHWSDEHCLKLLKNCY AALP----DHGKVI IVAEYILPPSPDPSIATKVV  
 CbCaOMT KGDAIFMKWICHWSDEHCLKFLKNCY AALP----EHGKVI IVAECILPLSPDPSLATKGV  
 PsCaOMT NADAI FMKWILHDWSDEHSVKILKNCYDALP----KNGKVI IVECI IPEVSDSSVAGHV  
 PaCaOMT TGQAIFMKWILHDWSDHCRKLLKNCHEALP----EKGKVI IVDVITILPVAE TSPYARQG  
 AmCaOMT RGDVILLQRLLHDWTD EESVKILKTCH EALP----DHGKVVI IEMMPAELP ENDVQAKNI  
 CjSOMT NAQNILLKWVLHDWDDRSIKILKNCWKALP----ENGTVIVIEFVLPQVLGNNAESFNA  
 TfSOMT NAQNILLKWVLHDWDDERSIKILQNCWKALP----EGGTVIVVEFVLPQILGNNAESFNA  
 PsSOMT1 KGQNMLLKWVLHDWGDERCVKLLKNCWNSLP----VGGKVLII EFVLPNELGNNAESFNA  
 PsSOMT2 NADAVLLKYVLHNWEDTECVNLLKRCKEAVP---ADKGV IIMDLVIDDD-DNSILTOAK  
 CjCoOMT NADAILLKSTLHNYEDDDCIKILNIAKEALPS---TGGKVI IVEIVVDTE-NLPLFTSAR

```

EcOMT      LAFDLLMIAHSSGGRERTEAEWKLLKAGGFSR-YKITPIK---GIPSIIEAYPDN-----
Ps7OMT     LIFDVLMMAHTTAGKERTAEWKILLNAGFPR-YNVIRTP---AFPCIIEAFPE-----
VvReOMT    LFFDMTMMIFA-PGRERDENEWKLFLDAGFSH-YKITPIL---GLRSLIEVYP-----
MpFlOMT    LFFDMQMLAII-TGKERSEKEWGLFFDAGFTN-YKITRVL---GLRSLIEVFP-----
ObEuOMT    LHFDMAMMCYF-NAKERTMSEWEKLIYDAGFKS-YKLTPAF---GVRSLIEAYP-----
Ps6OMT     LTLDDLMMMLNT-GGKERTKEEWKTLFDAAGFAS-HKVTQIS---AVQSVIEAYPY-----
PsSOMT3    LAMDLAMMLHT-GGKERTTEEDWKKLIDAAGFAS-CKITKLS---ALQSVIEAYPH-----
PsN7OMT    LTSDIDMMVNN-GGKERTKEWEKLFDAAGFAS-CKFTQMSVGFAAQSIIEVY-----
Cj6OMT     LTLDDLMMMLNT-GGKERTEEEWKLIHDAGYKG-HKITQIT---AVQSVIEAYPY-----
Tf6OMT     LTLDDLMMMLNT-GGKERTEEEWKLIHDAGYKG-YKITHIS---AVQSVIEAYPY-----
Ps4'OMT2   LILDIDMLVNT-GGRERTAADDWENLLKAGFRS-HKIRPIR---AIQSVIEAFP-----
Ps4'OMT1   LILDIDMLVNT-GGRERTAEDWENLLKAGFRS-HKIRPIR---AIQSVIEAFP-----
Cc4'OMT    LILDIDMLVNT-GGKERTKEVWEKIVKSAGFSG-CKIRHIA---AIQSVIEVFP-----
Cj4'OMT    LILDIDMLVNT-GGKERTKEVWEKIVKSAGFSG-CKIRHIA---AIQSVIEVFP-----
Tf4'OMT    LILDIDMLVNT-GGKERTKEDWEKLVKAGFSG-CKIRHIA---AIQSVIEVFP-----
PtFlOMT    LMLDMVMSHTDAGKERTSEWGYVLKEAGFSS-YTIKPIR---AVQSVIVASP-----
TtOMT      FQLDNIMLAHNPPGGKERTKDFEALS VKAGFTG-FKVVCGAFG--SW-VMEFCK-----
TtCaOMT    FQLDNIMLAHNPPGGKERTKDFEALS AKAGFTG-FKIICGAFG--SW-VMEFCK-----
CaCaOMT    VHVDIVMLAHNPPGGKERTKDFEALAKAGFTG-FRRACCAYQ--TW-VMEFHK-----
ObCaOMT    VHIDIVMLAHNPPGGKERTKEFQGLAKAAGFKQ-FNKACCAYN--TW-IMELLK-----
CbEuOMT    IHTDALMLAYNPPGGKERTKEFQALAMASGFRG-FKVASCAN--TY-VMEFLKTA-----
CbCaOMT    IHIDAIMLAHNPPGGKERTKEFEALAIAGAFKG-FKVACCAFN--TY-VMEFLKTA-----
PsCaOMT    FHLDNIMLAHNPPGGKERSLKQFENLAKDTGFTD-FQVVC SAYD--TY-VMEFYKN-----
PaCaOMT    FHIDLLMLAYNPPGGKERTQEFQDLAKEAGFAGGVKPVCCANG--MW-VMEFHK-----
AmCaOMT    SQVDIRMLIYTHGGRERTAEFQMLGKEAGFAS-SKFICGADL--YG-VVELYKKM-----
CjSOMT     LTPDLLMMALNPPGGKERTTIEFDGLAKAAGFAE-TKFFPISQG--LH-VMEFHKINC----
TfSOMT     LTPDLLMMALNPPGGKERTTIEFDGLAKAAGFAE-TKFFPISQG--LH-VMEFHKATAGVAS
PsSOMT1    LIPDLLLMLALNPPGGKERTISEYDDLGAAGFIK-TIPIPI SNG--LH-VIEFHK-----
PsSOMT2    LSLDLTVMNHG-GGRERTKEDWRNLIEMSGFSR-HEIIPIS---AMPSIIVAYP-----
CjCoOMT    LSMGMDMMLMS--GKERTKKEWEDLLRKANFTS-HQVIPIM---AIESIIVAYS-----

```

**Supplemental Figure 1.** Amino acid sequence alignment of opium poppy SOMT1, SOMT2, and SOMT3 with selected *O*-methyltransferases from different plant species. The alignment was used to construct the phylogenetic tree in Figure 3. Dots represent gaps introduced into sequences to maximize the alignment.
