# Supplementary material
Source: PubMed Central journal article supplement (PMC3375929)
Supplement: supp_pp.112.194886_194886Supplemental_Figure_3.pdf [file supp_pp.112.194886_194886Supplemental_Figure_3.pdf]

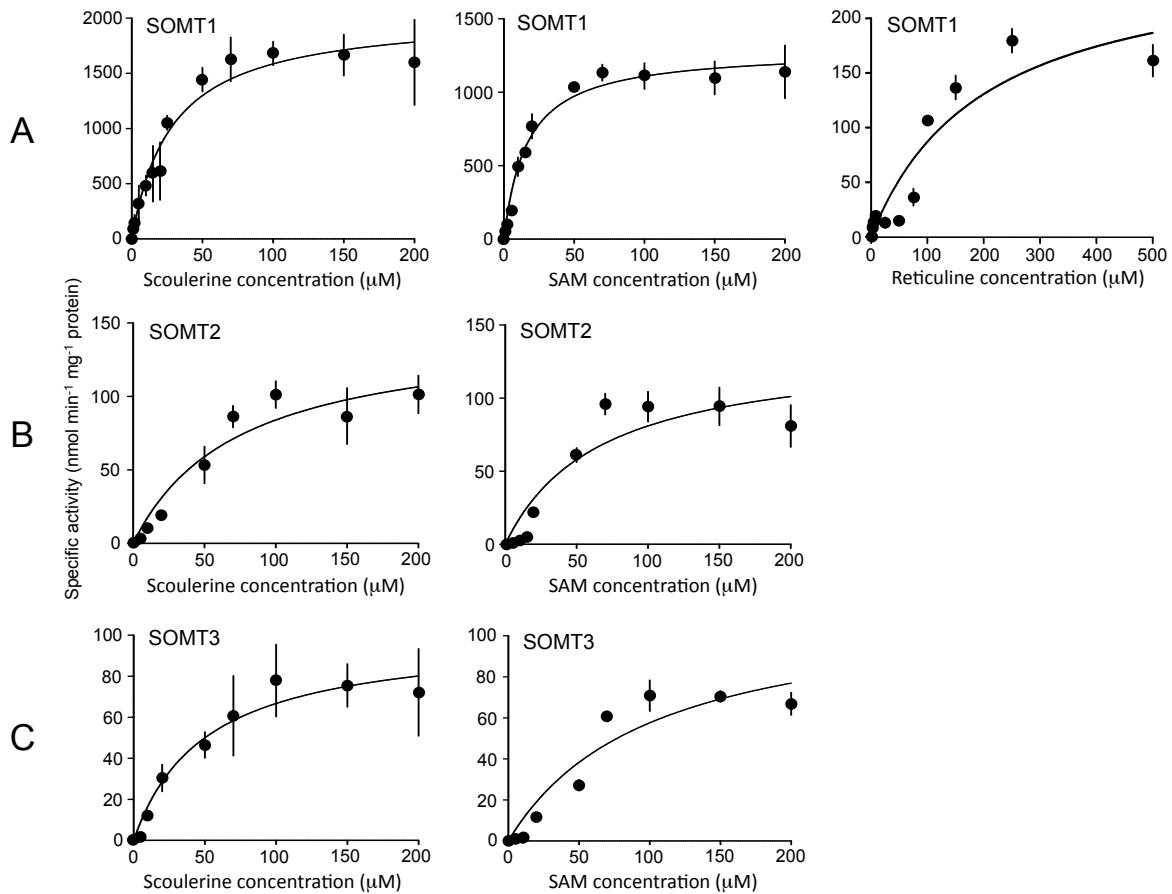

**Supplemental Figure 3.** Steady-state enzyme kinetics of purified recombinant SOMT1 (A), SOMT2 (B) and SOMT3 (C) using various substrate concentrations. Assays were carried out for 1 (SOMT1) to 4 hours (SOMT2 and SOMT3) with 5-50  $\mu\text{g}$  protein. Activity was based on the radioactivity recovered in an organic solvent phase extraction from aqueous enzyme assays. Kinetic parameters were determined by varying alkaloid concentrations from 1 to 500  $\mu\text{M}$  at a fixed concentration of 200  $\mu\text{M}$  SAM under optimal temperature and buffer conditions. The kinetic data for SAM were obtained by varying the SAM concentration between 1 to 200  $\mu\text{M}$  at a constant alkaloid concentration of 100  $\mu\text{M}$ . Kinetic constants were determined by fitting initial velocity versus substrate concentration to the Michaelis-Menten equation. Each point represent the mean specific activity  $\pm$  standard deviation monitored as a function of substrate concentration for three independent replicates.
