# Supplementary material
Source: PubMed Central journal article supplement (PMC3375929)
Supplement: supp_pp.112.194886_194886Supplemental_Figure_4.pdf [file supp_pp.112.194886_194886Supplemental_Figure_4.pdf]

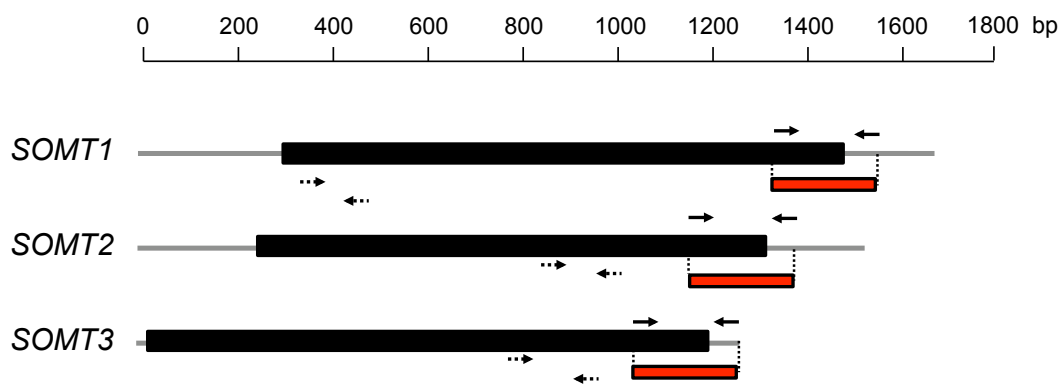

**Supplemental Figure 4.** Correlations in control (black squares) and gene-silenced plants (open circles) between the accumulation of noscapine (left panel) and papaverine (right panel) with the relative transcript abundance of *SOMT1*, *SOMT2*, or *SOMT3*.
