# Supplementary material
Source: PubMed Central journal article supplement (PMC3375929)
Supplement: supp_pp.112.194886_194886Supplemental_Figure_5.pdf [file supp_pp.112.194886_194886Supplemental_Figure_5.pdf]

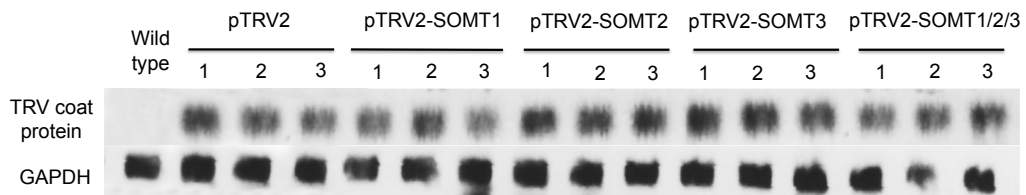

**Supplemental Figure 5.** Ethidium bromide-stained agarose gel showing the detection of TRV2 coat protein transcripts amplified by reverse transcription-PCR using total RNA extracted from infiltrated plants. GAPDH was used as the positive control. Primers used are listed in Supplemental Table 4.
