# Supplementary material
Source: PubMed Central journal article supplement (PMC3375929)
Supplement: supp_pp.112.194886_194886Supplemental_Figure_6.pdf [file supp_pp.112.194886_194886Supplemental_Figure_6.pdf]

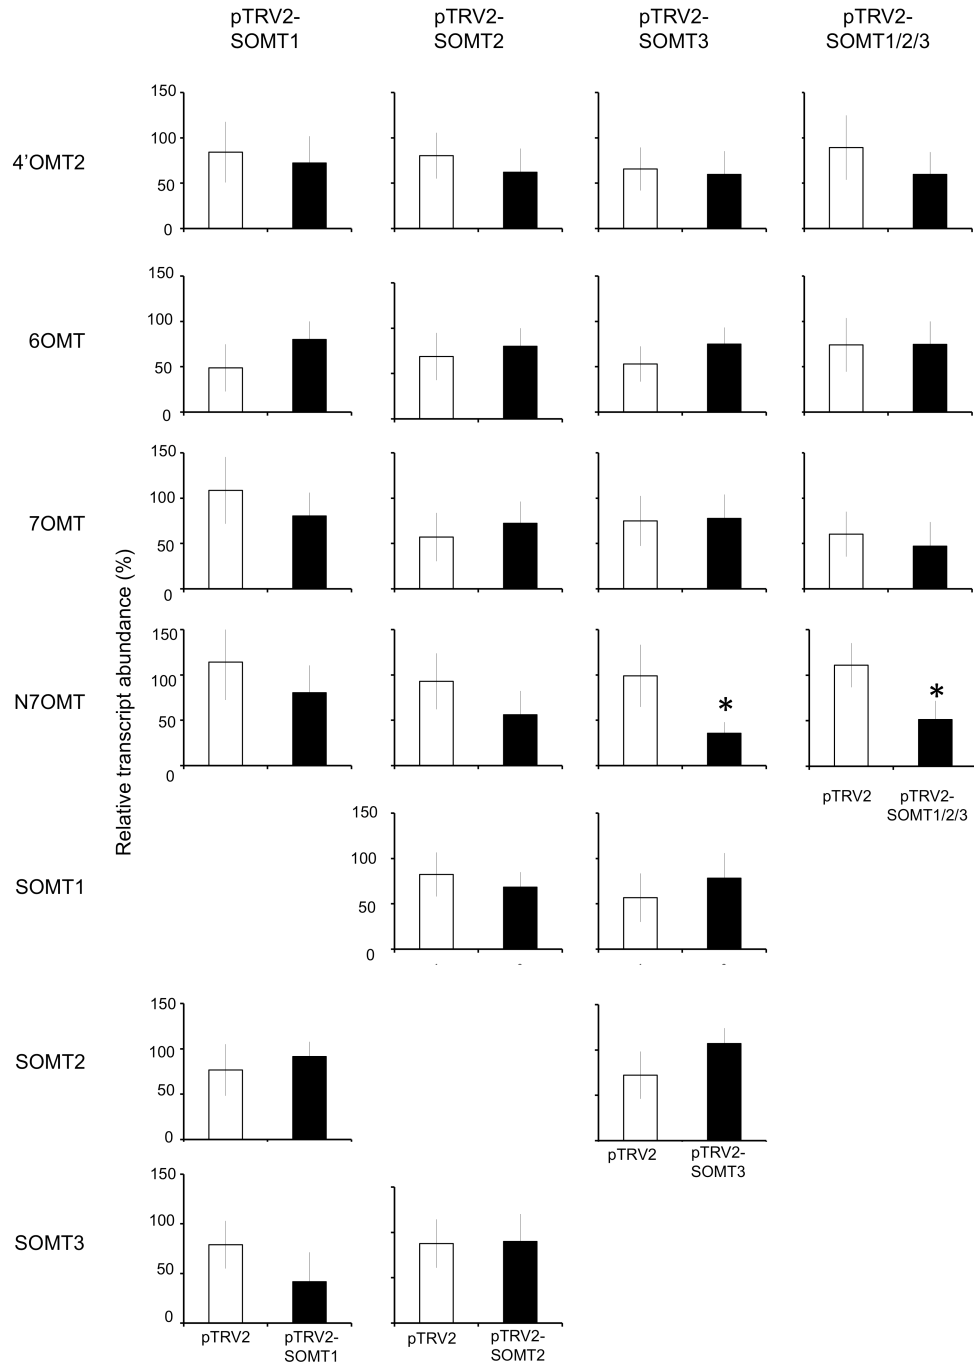

**Supplemental Figure 6.** Effects of silencing *SOMT1*, *SOMT2*, *SOMT3* or all three genes simultaneously (*SOMT1/2/3*) on the levels of other OMTs involved in BIA biosynthesis in opium poppy. For each gene, transcript levels in plants infiltrated with pTRV2-SOMT1, pTRV2-SOMT2, pTRV2-SOMT3, or pTRV2-SOMT1/2/3 (black bars) are compared with pTRV2-infiltrated controls (white bars). Differences in transcript abundance of control and silenced plants were analyzed by unpaired two-tailed Student's *t* test. Only the transcript abundance of *N7OMT* (asterisks) was significantly different in plants infiltrated with pTRV2-SOMT3 and pTRV2-SOMT1/2/3 compared with controls at P values < 0.05.
