# Supplementary material
Source: PubMed Central journal article supplement (PMC3375929)
Supplement: supp_pp.112.194886_194886Supplemental_Table_2.pdf [file supp_pp.112.194886_194886Supplemental_Table_2.pdf]

**Supplementary Table 2. Chromatographic and spectral data used for the identification and relative quantification of benzyloisoquinoline alkaloids by LC-MS.** The listed compounds were substrates and reaction products, or were major BIAs in opium poppy latex. Following liquid chromatography, molecular parent ions were generated, focused using positive-mode electrospray ionization (ESI[+]), and subjected to mass spectrometry. ESI[+]-CID spectra were compared with spectra obtained from authentic standards or from the indicated reference to identify or annotate compounds. The characterization of compounds without reference spectra was inferred as described in the Materials and Methods.

| Compound      | [M+H] <sup>+</sup> | Ret. time (min) | CE (eV) | ESI-CID, <i>m/z</i> (Relative abundance)                                                                                                     | Characterization criteria               |
|---------------|--------------------|-----------------|---------|----------------------------------------------------------------------------------------------------------------------------------------------|-----------------------------------------|
| Morphine      | 286                | 0.91            | 25      | 286 (100), 268 (4), 229 (10), 227 (4), 211 (10), 209 (6), 201 (23), 193 (5), 185 (10), 183 (12), 173 (11), 165 (7), 155 (6), 123 (1), 58 (7) | Authentic standard                      |
| Codeine       | 300                | 3.18            | 35      | 300 (100), 282 (5), 266 (2), 243 (8), 241 (1), 225 (3), 215 (24), 199 (14), 183 (14), 165 (8), 155 (1), 137 (3), 58 (11)                     | Authentic standard                      |
| Thebaine      | 312                | 6.4             | 25      | 312 (2), 281 (2), 266 (4), 255 (1), 251 (11), 249 (2), 237(1), 234 (2), 223 (2), 221 (7), 218 (4), 195 (2), 177 (1), 58 (100)                | Authentic standard                      |
| Norreticuline | 316                | 3.64            | 25      | 316 (1), 267 (1), 254 (1), 237 (1), 221 (1), 178 (100), 161 (12), 151 (5), 143 (19), 137 (22)                                                | Gesell et al. 2009; Pienkny et al. 2009 |
| Scoulerine    | 328                | 3.11            | 25      | 328 (25), 178 (100), 151 (5)                                                                                                                 | Authentic standard                      |
| Reticuline    | 330                | 2.77            | 25      | 330 (2), 298 (2), 267 (3), 239 (2), 227 (1), 207 (2), 192 (100), 175 (23), 151 (3), 143 (17), 137 (30)                                       | Authentic standard                      |
| Norcodamine   | 330                | 3.07            | 25      | 178.2 (100), 175.2 (16), 163.3 (6), 151.2 (29), 143 (19)                                                                                     | Inferred                                |
| Papaverine    | 340                | 8.08            | 25      | 340 (86), 324 (59), 310 (2), 296 (9), 202 (100), 187 (3), 171 (11), 123 (2)                                                                  | Authentic standard                      |

|                       |     |       |    |                                                                                                                              |                        |
|-----------------------|-----|-------|----|------------------------------------------------------------------------------------------------------------------------------|------------------------|
| Tetrahydrocolumbamine | 342 | 3.93  | 25 | 342 (14), 327 (1), 265 (1),<br>192 (15), 178 (100), 165<br>(7), 163 (2), 151 (6), 58 (1)                                     | Authentic<br>standard  |
| Codamine              | 344 | 3.14  | 25 | 192 (100), 177 (7), 175.2<br>(13), 151 (23), 143 (17)                                                                        | Inferred               |
| Tetrahydropapaverine  | 344 | 3.87  | 20 | 344 (1), 327 (2), 312 (2),<br>296 (10), 281 (4), 192<br>(100), 189 (38), 174 (17),<br>165 (3), 158 (8), 151 (46),<br>136 (1) | Authentic<br>standard  |
| Tetrahydropalmatine   | 356 | 4.44  | 20 | 356 (48), 192 (100), 176<br>(13), 165 (27), 150 (3)                                                                          | Authentic<br>standard  |
| Laudanosine           | 358 | 3.44  | 25 | 358 (3), 327 (3), 312 (1),<br>296 (4), 206 (100), 189<br>(34), 174 (10), 165 (8), 158<br>(5), 151 (29), 44 (1)               | Schmidt et al.<br>2007 |
| Narcotoline           | 400 | 7.9   | 20 | 400 (65), 382 (5), 351 (16),<br>339 (47), 309 (4), 206<br>(100), 192 (4), 165 (13)                                           | Authentic<br>standard  |
| Noscapine             | 414 | 10.17 | 25 | 414 (4), 365 (5), 353 (21),<br>323 (5), 220 (100), 206 (4),<br>179 (8)                                                       | Authentic<br>standard  |
