# Supplementary material
Source: PubMed Central journal article supplement (PMC3375929)
Supplement: supp_pp.112.194886_194886Supplemental_Table_3.pdf [file supp_pp.112.194886_194886Supplemental_Table_3.pdf]

**Supplemental Table 3.** Relative alkaloid content (% maximum) of control (pTRV2) and *SOMT1*-, *SOMT2*-, *SOMT3*- and *SOMT1/2/3*-silenced plants determined using LC-MS/MS.

|                 | Morphine | Codeine | Thebaine | Reticuline | Scoulerine | Papaverine | Tetrahydrocolumbamine | Narcotine | Noscapine |
|-----------------|----------|---------|----------|------------|------------|------------|-----------------------|-----------|-----------|
| pTRV2           | 100      | 100     | 100      | 100        | 30.9       | 100        | 29.0                  | 100       | 100       |
| pTRV2-SOMT1     | 78.3     | 36.6    | 47.9     | 82.1       | 100        | 53.3       | 26.5                  | 27.0      | 59.7      |
| pTRV2-SOMT2     | 55.4     | 54.0    | 65.9     | 54.7       | 56.2       | 83.7       | 100                   | 78.9      | 81.0      |
| pTRV2-SOMT3     | 85.5     | 79.4    | 80.0     | 76.4       | 22.2       | 86.2       | 34.1                  | 86.8      | 90.6      |
| pTRV2-SOMT1/2/3 | 63.8     | 46.1    | 59.0     | 34.7       | 85.0       | 71.1       | 12.6                  | 54.7      | 52.3      |
