# Supplementary material
Source: PubMed Central journal article supplement (PMC3375929)
Supplement: supp_pp.112.194886_194886Supplemental_Table_4.pdf [file supp_pp.112.194886_194886Supplemental_Table_4.pdf]

**Supplemental Table 4.** Primer sequences used for the assembly of expression vectors and virus-induced gene-silencing constructs, to confirm the infiltration of plants with tobacco rattle virus, and for real-time quantitative PCR (RT-qPCR) analyses.

**Expression of recombinant proteins**

Primers used to amplify ORFs from cDNA for ligation to pRSETA

| ORF          | Forward primer                  | Reverse primer               |
|--------------|---------------------------------|------------------------------|
| <i>SOMT1</i> | ATTGGATCCATGGCTACCAATGGCGAAATTT | TGCCTGCAGCCATTCATTTGTGAAACTC |
| <i>SOMT2</i> | CGGGATCCATGGAAATTCATTTAGAAAGCC  | TGCTGCAGCTAAGGATAAGCAACAATAA |
| <i>SOMT3</i> | TGGGGATCCATGGAAGTAGTAAGTAAG     | TAGGTACCTCAATGAGGGTAAGCCTCA  |

**Virus-induced gene silencing**

| Sequence                                                     | Forward primer                | Reverse primer                 |
|--------------------------------------------------------------|-------------------------------|--------------------------------|
| Primers used in sequence amplification for ligation to pTRV2 |                               |                                |
| SOMT1V                                                       | GACTCTAGACGATTTACTCCTGATGGCTC | ACTCGAGGAGCAAATGCATGAAATGGATG  |
| SOMT2V                                                       | TCTAGATCTCACTGTGATGAACCATGG   | CTCGAGCTACCGAATGAGAATGCATAA    |
| SOMT3V                                                       | CTATCTAGACCCTTTGGTTAATTGTTG   | CATCTCGAGGTAATTGATAATTAAGATCAC |

Primers used for the detection of *A. tumefaciens*-infiltrated opium poppy plants.

|           |                     |                     |
|-----------|---------------------|---------------------|
| TRV2-coat | ATGGGAGATATGTACGATG | TAGGGATTAGGACGTATC  |
| GAPDH     | CTCATTTGAAGGGTGGAGC | GTCATTGCGTGGACAGTGG |

**RT-qPCR**

Primers used for relative quantification of gene-specific transcript abundance

| Gene          | Forward primer         | Reverse primer         |
|---------------|------------------------|------------------------|
| <i>SOMT1</i>  | TATGGTCATAATCATCAATCA  | TTGGAATGCATATTA ACTTCC |
| <i>SOMT2</i>  | CGTCCAGGTGTTGAGTTCATC  | TCCCAATTGTGCAGGACATAC  |
| <i>SOMT3</i>  | GCTTCAGCATTGGTTAACGAG  | GCTTTGGATATGGCTTTCACTG |
| <i>Actin</i>  | TCTCAACCCAAAGGCTAATCG  | CCCCAGAATCCAAGACAATACC |
| <i>4'OMT1</i> | GGAGTTGAGAAGGTTTACTCG  | CCTTGAGTATCATCGGCACC   |
| <i>6OMT</i>   | GCTCTAGAGTCACTCAGATAT  | CAGCTCGAGCAATGCAAGTTG  |
| <i>7OMT</i>   | GTAGCCATTTTGTGATCGAG   | CCATCATCATCTCCCAACATCG |
| <i>N7OMT</i>  | GGTCTCAACAATCAATGGTTCC | GCTCTTTCCTAACGCTGTCTC  |
